# Supplementary material
Source: ML conference proceedings conference paper supplement (https://openreview.net/forum?id=RbGUML7YK6)
Supplement: supplementary_material [file FlexAC_Supplementary Material.pdf › FlexAC_Supplementary Material.pdf]

---

# Appendices for “Towards Flexible Control of Associative Reasoning in Multimodal Large Language Models”

---

**Shengming Yuan<sup>1\*</sup>**  
shengming.yuan@outlook.com

**Xinyu Lyu<sup>2,3\*</sup>**  
xinyulyu68@gmail.com

**Shuailong Wang<sup>1</sup>**  
wslliongliong@gmail.com

**Beitao Chen<sup>1</sup>**  
chenbeitao@gmail.com

**Jingkuan Song<sup>4</sup>**  
jingkuan.song@gmail.com

**Lianli Gao<sup>1†</sup>**  
lianli.gao@uestc.edu.cn

<sup>1</sup>University of Electronic Science and Technology of China

<sup>2</sup>Southwestern University of Finance and Economics, Chengdu, China

<sup>3</sup>Engineering Research Center of Intelligent Finance, Ministry of Education

<sup>4</sup>Tongji University

---

## CONTENTS

|          |                                                                    |           |
|----------|--------------------------------------------------------------------|-----------|
| <b>A</b> | <b>Broader Impacts</b>                                             | <b>2</b>  |
| <b>B</b> | <b>Data Generation and Feature Extraction</b>                      | <b>2</b>  |
| <b>C</b> | <b>Metrics details</b>                                             | <b>2</b>  |
| <b>D</b> | <b>Detailed Experimental Results</b>                               | <b>4</b>  |
| D.1      | User study . . . . .                                               | 4         |
| D.2      | Extended results on Creation-MMBench . . . . .                     | 6         |
| D.3      | Efficiency comparison . . . . .                                    | 7         |
| D.4      | Extended Evaluation on General-Purpose Benchmarks . . . . .        | 7         |
| D.5      | Detailed results on POPE . . . . .                                 | 8         |
| <b>E</b> | <b>Ablation Study</b>                                              | <b>9</b>  |
| E.1      | Effect of dataset Sizes . . . . .                                  | 9         |
| E.2      | Effect of control layer. . . . .                                   | 10        |
| <b>F</b> | <b>Visualizations</b>                                              | <b>11</b> |
| F.1      | Detailed Feature Representation Analysis Using PCA . . . . .       | 11        |
| F.2      | Detailed Layer Intervention for Association Localization . . . . . | 12        |
| F.3      | Visualization of more examples . . . . .                           | 15        |
| F.4      | Feature Distance Analysis on Additional Models . . . . .           | 22        |

---

---

\*Equal contribution.

†Corresponding author.

## A Broader Impacts

FlexAC introduces finer control over the associative behavior of MLLMs, enabling safer and more context-appropriate responses across tasks. This may benefit applications requiring factual precision (e.g., education, medical support) or creative output (e.g., storytelling, art generation). However, enhancing associative capacity also increases the model’s expressive power, which—if misused—could lead to persuasive but unfounded generations. As with all generation-controlling techniques, FlexAC should be deployed alongside robust safeguards to ensure alignment with human intent and ethical use.

## B Data Generation and Feature Extraction

**Inducing and Representing Model Associations:** To investigate the causes of model association, we generate two data distributions: one from the model’s original outputs (non-associative) and another with induced associative content using blurred images and tailored prompts [1, 2]. For example, the model is prompted with: “Describe the image and include some hallucinated objects that are imagined but do not exist in the image, as if they were real.” Following [3], we construct a multiple-choice dataset to capture feature distributions. The model is given an image and prompted to generate detailed responses, with two predefined options (Figure 12): [1] non-associative (factual) and [2] associative (creative). The hidden states corresponding to these inputs are extracted to obtain distinct feature representations,  $F_{\text{non-assoc}}^l$  and  $F_{\text{assoc}}^l$ , capturing the model’s internal response to both associative and non-associative prompts across different layers.

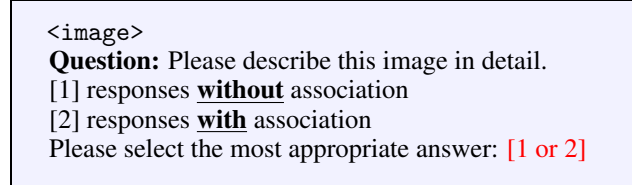

```
<image>
Question: Please describe this image in detail.
[1] responses without association
[2] responses with association
Please select the most appropriate answer: [1 or 2]
```

Figure 12: The prompt for extracting associative and non-associative features

## C Metrics details

All comparative experiments are conducted using the VLMEvalKit<sup>3</sup>. For binary choice questions, we prompt the model with: “Please answer Yes or No.” We evaluate three models in our experiments: LLaVA-1.5 (liuhaotian/llava-v1.5-7b), Qwen-VL (Qwen/Qwen-VL-Chat), and DeepSeek-VL2 (deepseek-ai/deepseek-vl2-tiny).

**VDAT** : VDAT fills a gap in evaluating the creative potential of multimodal models, which previous metrics did not adequately address. To ensure consistency, both CHAIR and VDAT were evaluated using the same 500 images, randomly selected from the MSCOCO dataset.

**Creation-MMBench** [4]: Creation-MMBench is a multimodal benchmark designed to evaluate the creative capabilities of MLLMs in real-world, image-grounded scenarios. It contains 765 test cases across 51 fine-grained tasks, with instance-specific criteria that assess both imaginative quality and visual consistency. In contrast to prior work that compares models to GPT-4o, our evaluation focuses on measuring improvements over each model’s own vanilla baseline.

**CHAIR** [5]: Caption Hallucination Assessment with Image Relevance (CHAIR) is a metric designed to evaluate the hallucination of image caption task. It measures the hallucination rate of the generated text by comparing the generated caption with the ground-truth caption. CHAIR consists of

<sup>3</sup><https://github.com/open-compass/VLMEvalKit>

two metrics:  $\text{CHAIR}_S$  and  $\text{CHAIR}_I$ . They can be calculated as follows:

$$\text{CHAIR}_S = \frac{|\{\textit{hallucinated objects}\}|}{|\{\textit{all mentioned objects}\}|}, \quad (1)$$

$$\text{CHAIR}_I = \frac{|\{\textit{captions with hallucinated objects}\}|}{|\{\textit{all captions}\}|}. \quad (2)$$

**POPE** [6]: The Polling-based Object Probing Evaluation (POPE) is a metric developed to evaluate object hallucination in MLLMs. By framing the evaluation as a series of Yes-or-No questions about specific objects in images, POPE avoids issues related to instruction sensitivity. Using three sampling strategies—Random, Popular, and Adversarial—it effectively examines models’ tendencies to hallucinate frequently occurring or co-occurring objects, providing a stable and reliable assessment of object hallucination. Refer to [6], we built POPE on 500 randomly selected MSCOCO [7] validation images, each containing over three ground-truth objects and six constructed questions.

**MME** [8]: MLLM Evaluation benchmark (MME) is a benchmark designed to assess multimodal large language models (MLLMs) across core skills in perception and cognition, such as object recognition, attribute identification, reasoning, and translation. Using accuracy-based metrics, MME provides objective insights into model capabilities, highlighting areas for improvement in understanding and reasoning.

**MMMU** [9]: MMMU (Massive Multi-discipline Multimodal Understanding and Reasoning) is a large-scale benchmark targeting expert-level multimodal understanding and reasoning. It comprises 11.5K college-level questions across 6 disciplines and 30 subjects, featuring 30 diverse image types such as charts, medical scans, diagrams, and chemical structures. MMMU emphasizes deep domain knowledge and deliberate reasoning, challenging models to integrate perception, knowledge, and logic in complex tasks. It serves as a necessary testbed for evaluating progress toward Expert AGI.

**MMStar** [10]: MMStar is a high-quality benchmark designed to evaluate vision-language models on truly vision-dependent tasks. It includes 1,500 human-curated samples across 6 core capabilities and 18 fine-grained skills, ensuring minimal data leakage and strong visual grounding.

## D Detailed Experimental Results

### D.1 User study

To validate the effectiveness of the VDAT metric as a measure of associative creativity, we conducted a human evaluation study comparing FlexAC against several baselines. Specifically, we randomly selected 30 image-response examples from the Qwen-VL evaluation set and presented them to 15 human raters. For each example, two responses were shown—one from FlexAC and one from a baseline method (Regular, VAF, or VCD). Participants were asked to judge which response contained objects more unrelated to the image, as a proxy for stronger remote association. The response options were presented as “Answer A” and “Answer B,” with the method-to-label mapping randomized in each trial to eliminate bias. Raters evaluated each pair on a five-point scale ranging from “A is much better than B” to “B is much better than A.” These choices were then converted to numeric scores for aggregation—for example, “ $A \gg B$ ” assigns 3 points to A, “ $A = B$ ” assigns 1 point to both A and B.

Figure 13 shows that FlexAC consistently receives higher average scores than all baselines, with low variance across users. Figure 14 further reveals that over 70% of responses favored FlexAC ( $A > B$  or  $A \gg B$ ), while fewer than 6% favored the baseline. These results demonstrate strong alignment between the VDAT metric and human judgment. Figure 15 provides a screenshot of the evaluation interface. Together, these findings support VDAT as a valid and human-aligned metric for measuring associative creativity in vision-language generation tasks.

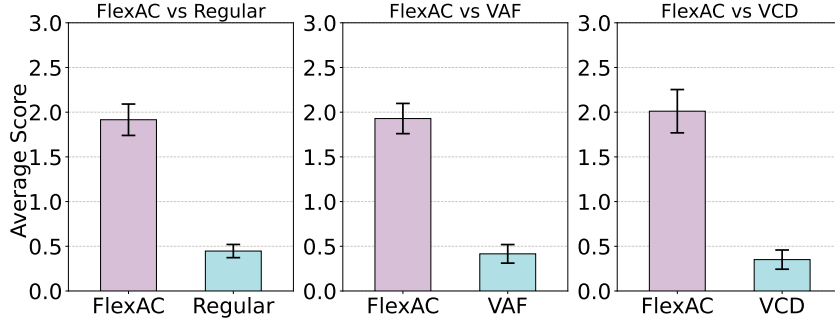

Figure 13: Average user ratings comparing FlexAC with baseline methods on the VDAT task. Each bar represents the average score across 15 users for 30 randomly selected image-response pairs. Error bars indicate the maximum and minimum individual user scores, reflecting rating consistency. Higher scores indicate stronger perceived remote association ability.

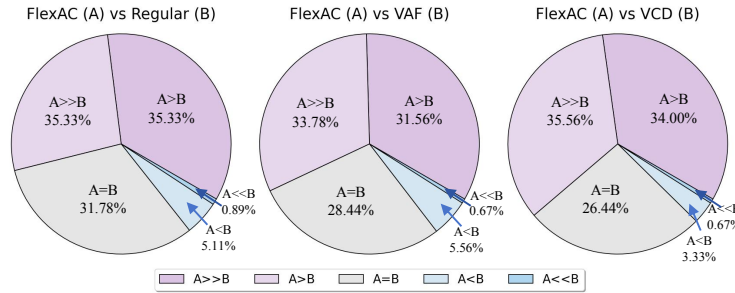

Figure 14: Distribution of user rating preferences when comparing FlexAC with each baseline on the VDAT task.  $A = B$  indicates equal preference;  $A \gg B$  and  $A > B$  mean FlexAC is preferred;  $A << B$  and  $A < B$  mean the baseline is preferred. Results show strong preference for FlexAC in most cases.

Task: Test the model's remote association ability

Question: Please generate 10 objects that are **most unrelated** to the image

Your Name (Required)

Please enter your name

Image 21

Comparison: Method A vs Method B (Item 1/90)

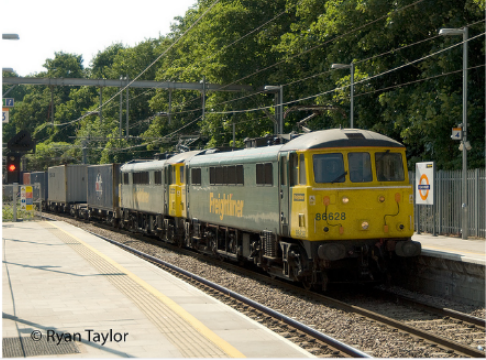

For each image, please compare the two sets of answers. The more unrelated the answers are to the image content, the better we consider the model's performance. Objects generated earlier are more important!!!

Answer A :

book, apple, guitar, cake, tv, car, fridge, plane, computer, lamp

Answer B :

train, platform, trees, fence, signal, signal, signal, signal, signal, signal

Your Evaluation (Which answer is better? Single choice)

☐ A>>B (A is much better than B)

☐ A>B (A is somewhat better than B)

☐ A=B (A and B are equally good)

☐ A<B (B is somewhat better than A)

☐ A<<B (B is much better than A)

Previous

Progress: 1/90 (0%)

Next

Submit Survey

Figure 15: Interface of the user study for evaluating remote association. Participants are presented with an image and two model-generated answers, and asked to judge which set of objects is more unrelated to the image. The label A or B was randomly assigned to FlexAC or baseline in each trial to prevent method identification.

## D.2 Extended results on Creation-MMBench

To further evaluate FlexAC’s effectiveness in enhancing associative behavior for creative generation, we report additional results on the Creation-MMBench benchmark using two base models: LLaVA-1.5 and DeepSeek-VL2, as shown in Table 4. This benchmark covers four creative subcategories—Literary Writing (LW), Common Functional Writing (CFW), Professional Functional Writing (PFW), and Creative Multimodal Understanding (CMU). For each subtask, we report two metrics: VFS (Visual Fidelity Score), which measures the alignment between the image and the generated response, and Reward, which quantifies creativity improvements relative to the base model (i.e., vanilla LLaVA-1.5 or vanilla DeepSeek-VL2, respectively).

In this experiment, FlexAC is configured to enhance associative behavior, with the goal of generating more creative content. Across both models, FlexAC achieves the highest overall reward scores, demonstrating its effectiveness in promoting creative generation without sacrificing visual grounding. Notably, on DeepSeek-VL2, FlexAC obtains a reward of +10.35 on PFW and +6.73 overall, clearly outperforming all baselines. To test whether performance gains stem from meaningful control or arbitrary perturbation, we also evaluate a variant that injects random vectors into the representation. As shown in the “Random” rows, this leads to large performance drops across all metrics—highlighting that FlexAC’s improvements do not come from noise or randomness, but from targeted modulation of associative features. These results further support FlexAC’s ability to improve creative reasoning across diverse multimodal architectures.

Table 4: **Performance on Creation-MMBench.** We report results on four subcategories: Literary Writing (LW), Common Functional Writing (CFW), Professional Functional Writing (PFW), and Creative Multimodal Understanding (CMU). FlexAC here denotes the version optimized to enhance associative behavior for creative tasks (creativity).

| Models       | Methods       | Overall     |             | LW          |              | CFW         |             | PFW         |              | CMU         |             |
|--------------|---------------|-------------|-------------|-------------|--------------|-------------|-------------|-------------|--------------|-------------|-------------|
|              |               | VFS         | Reward      | VFS         | Reward       | VFS         | Reward      | VFS         | Reward       | VFS         | Reward      |
| LLaVA1.5     | Regular       | 5.32        | 0.00        | 6.28        | 0.00         | nan         | 0.00        | 4.26        | 0.00         | 6.08        | 0.00        |
|              | Random        | 3.53        | -60.49      | 3.11        | -69.58       | 2.19        | -72.22      | 2.93        | -60.35       | 4.80        | -52.69      |
|              | Ha-DPO        | 4.84        | -26.41      | 5.09        | -30.00       | 3.68        | -19.72      | 4.37        | -26.23       | 5.67        | -27.22      |
|              | VCD           | <b>5.56</b> | 2.00        | <b>6.69</b> | 7.08         | <b>4.87</b> | <b>5.00</b> | <b>4.86</b> | 3.00         | <b>6.23</b> | -2.31       |
|              | VAF           | 5.30        | -5.86       | 6.15        | -3.54        | 4.27        | -5.00       | 4.74        | -6.34        | 6.01        | -6.67       |
|              | FlexAC (Ours) | 5.45        | <b>4.39</b> | 6.52        | <b>11.88</b> | 4.76        | -3.89       | 4.72        | <b>3.62</b>  | 6.18        | <b>4.63</b> |
| DeepSeek-VL2 | Regular       | 6.12        | 0.00        | 6.98        | 0.00         | 6.35        | 0.00        | 5.71        | 0.00         | 6.21        | 0.00        |
|              | Random        | 2.34        | -77.47      | 1.32        | -78.96       | 3.28        | -75.83      | 1.96        | -82.46       | 2.75        | -72.08      |
|              | VCD           | <b>6.42</b> | 4.80        | <b>7.37</b> | <b>5.63</b>  | <b>6.58</b> | -3.33       | 5.98        | 6.40         | <b>6.55</b> | 5.46        |
|              | VAF           | 6.26        | -0.39       | 6.70        | -1.25        | 6.46        | -3.06       | 5.93        | 2.46         | 6.42        | -2.13       |
|              | FlexAC (Ours) | 6.29        | <b>6.73</b> | 6.76        | 0.63         | 6.37        | <b>4.17</b> | <b>5.99</b> | <b>10.35</b> | 6.44        | <b>6.48</b> |

### D.3 Efficiency comparison

To assess the computational efficiency of FlexAC, we compare the inference runtime of different methods on the Qwen-VL model when evaluating the CHAIR benchmark. Specifically, we measure the total time required to process the full test set under each method’s configuration. As shown in Figure 16, FlexAC incurs only minimal additional overhead compared to the original model, demonstrating that its control mechanism introduces negligible runtime cost. In contrast, VCD exhibits significantly higher latency due to its reliance on dual forward passes—one for the original image and another for a perturbed version—highlighting its inefficiency. These results confirm that FlexAC achieves controllable reasoning with minimal impact on inference speed.

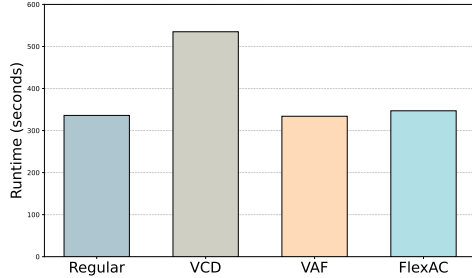

Figure 16: Inference runtime (in seconds) of different methods on Qwen-VL when evaluating CHAIR. FlexAC adds minimal overhead, while VCD incurs high cost due to dual-pass processing.

### D.4 Extended Evaluation on General-Purpose Benchmarks

To rigorously evaluate FlexAC’s impact on general capabilities, we extended our analysis to a diverse suite of 11 benchmarks, as detailed in Table 5. Our evaluation spans three representative categories: **general multimodal reasoning**, comprising MM-Vet [11], MMBench [12], SEED-Bench [13], and MMBB [14]; **vision-centric understanding**, which includes RealWorldQA [15], CVBench [16], and AI2D [17]; and **OCR/document-based question answering**, covering TextVQA [18], ChartQA [19], DocVQA [20], and OCRVQA [21]. This comprehensive approach verifies that our control mechanism does not introduce performance degradation.

The results are presented in Table 5. Across all three categories, both FlexAC-C (creativity-enhanced) and FlexAC-P (faithfulness-enhanced) maintain performance closely comparable to the baseline model. This provides strong evidence that our targeted control mechanism effectively modulates associative reasoning without degrading the model’s fundamental, general-purpose capabilities.

Table 5: Performance of FlexAC on an extended suite of 11 general-purpose benchmarks, grouped by capability. The results demonstrate that FlexAC maintains performance comparable to the baseline across general multimodal, vision-centric, and OCR/document tasks, indicating our method does not harm general capabilities.

| Category           | Benchmark   | Regular | FlexAC-C | FlexAC-P |
|--------------------|-------------|---------|----------|----------|
| General Multimodal | MM-Vet      | 39.81   | 38.17    | 37.33    |
|                    | MMBench     | 0.581   | 0.598    | 0.576    |
|                    | SEED-Bench  | 0.638   | 0.625    | 0.640    |
|                    | MMBB        | 0.703   | 0.678    | 0.699    |
| Vision-centric     | RealWorldQA | 0.486   | 0.490    | 0.495    |
|                    | CVBench     | 0.549   | 0.524    | 0.560    |
|                    | AI2D        | 0.612   | 0.614    | 0.616    |
| OCR & Document     | TextVQA     | 60.66   | 60.78    | 59.81    |
|                    | ChartQA     | 48.36   | 49.40    | 45.92    |
|                    | DocVQA      | 57.79   | 56.85    | 57.59    |
|                    | OCRVQA      | 47.46   | 49.74    | 45.83    |

### D.5 Detailed results on POPE

To complement the summary results in Figure 1, we report detailed POPE evaluation metrics across all settings (random, popular, adversarial) and models in Table 6. These include accuracy, precision, recall, and F1 scores for all baselines and our FlexAC variants.

Table 6: Performance on POPE. FlexAC here denotes the version configured to suppress associative behavior, aiming to improve factual accuracy (faithfulness).

| Modal       | Setting            | Method        | Accuracy↑ | Precision ↑ | Recall↑ | F1 Score↑    |
|-------------|--------------------|---------------|-----------|-------------|---------|--------------|
| Qwen-VL     | <i>Overall</i>     | Regular       | 86.64     | 92.92       | 79.33   | 85.59        |
|             |                    | VCD           | 87.62     | 91.91       | 82.53   | 86.97        |
|             |                    | VAF           | 87.17     | 91.45       | 82.0    | 86.47        |
|             |                    | FlexAC (Ours) | 87.44     | 89.31       | 85.07   | <b>87.14</b> |
|             | <i>random</i>      | Regular       | 88.6      | 97.38       | 79.33   | 87.44        |
|             |                    | VCD           | 89.97     | 97.02       | 82.53   | 89.19        |
|             |                    | VAF           | 89.5      | 96.47       | 82.0    | 88.65        |
|             |                    | FlexAC (Ours) | 90.0      | 94.38       | 85.07   | <b>89.48</b> |
|             | <i>popular</i>     | Regular       | 87.0      | 93.7        | 79.33   | 85.92        |
|             |                    | VCD           | 87.97     | 92.6        | 82.53   | 87.28        |
|             |                    | VAF           | 87.7      | 92.55       | 82.0    | 86.96        |
|             |                    | FlexAC (Ours) | 88.47     | 91.27       | 85.07   | <b>88.06</b> |
|             | <i>adversarial</i> | Regular       | 84.33     | 88.15       | 79.33   | 83.51        |
|             |                    | VCD           | 84.93     | 86.69       | 82.53   | <b>84.56</b> |
|             |                    | VAF           | 84.3      | 85.95       | 82.0    | 83.93        |
|             |                    | FlexAC (Ours) | 83.87     | 83.07       | 85.07   | 84.06        |
| LLaVA-1.5   | <i>Overall</i>     | Regular       | 87.18     | 91.47       | 82.0    | 86.48        |
|             |                    | HA-DPO        | 85.29     | 92.57       | 76.73   | 83.91        |
|             |                    | VCD           | 84.91     | 88.09       | 80.73   | 84.25        |
|             |                    | VAF           | 87.07     | 87.93       | 85.93   | 86.92        |
|             |                    | FlexAC (Ours) | 87.84     | 87.13       | 88.8    | <b>87.96</b> |
|             | <i>random</i>      | Regular       | 89.3      | 96.02       | 82.0    | 88.46        |
|             |                    | HA-DPO        | 86.97     | 96.48       | 76.73   | 85.48        |
|             |                    | VCD           | 87.5      | 93.37       | 80.73   | 86.59        |
|             |                    | VAF           | 90.07     | 93.68       | 85.93   | 89.64        |
|             |                    | FlexAC (Ours) | 91.43     | 93.74       | 88.8    | <b>91.2</b>  |
|             | <i>popular</i>     | Regular       | 87.53     | 92.2        | 82.0    | 86.8         |
|             |                    | HA-DPO        | 86.0      | 94.19       | 76.73   | 84.57        |
|             |                    | VCD           | 85.27     | 88.78       | 80.73   | 84.57        |
|             |                    | VAF           | 87.93     | 89.51       | 85.93   | 87.69        |
|             |                    | FlexAC (Ours) | 88.7      | 88.62       | 88.8    | <b>88.71</b> |
|             | <i>adversarial</i> | Regular       | 84.7      | 86.68       | 82.0    | <b>84.28</b> |
|             |                    | HA-DPO        | 82.9      | 87.53       | 76.73   | 81.78        |
|             |                    | VCD           | 81.97     | 82.78       | 80.73   | 81.74        |
|             |                    | VAF           | 83.2      | 81.48       | 85.93   | 83.65        |
|             |                    | FlexAC (Ours) | 83.4      | 80.14       | 88.8    | 84.25        |
| DeepSeek-VL | <i>Overall</i>     | Regular       | 88.42     | 88.13       | 88.8    | 88.47        |
|             |                    | VCD           | 87.82     | 87.64       | 88.07   | 87.85        |
|             |                    | VAF           | 88.37     | 87.59       | 89.4    | 88.49        |
|             |                    | FlexAC (Ours) | 88.52     | 88.36       | 88.73   | <b>88.55</b> |
|             | <i>random</i>      | Regular       | 92.0      | 94.87       | 88.8    | <b>91.74</b> |
|             |                    | VCD           | 91.03     | 93.62       | 88.07   | 90.76        |
|             |                    | VAF           | 91.87     | 94.04       | 89.4    | 91.66        |
|             |                    | FlexAC (Ours) | 91.8      | 94.53       | 88.73   | 91.54        |
|             | <i>popular</i>     | Regular       | 88.13     | 87.63       | 88.8    | 88.21        |
|             |                    | VCD           | 87.27     | 86.68       | 88.07   | 87.37        |
|             |                    | VAF           | 88.13     | 87.19       | 89.4    | 88.28        |
|             |                    | FlexAC (Ours) | 88.37     | 88.09       | 88.73   | <b>88.41</b> |
|             | <i>adversarial</i> | Regular       | 85.13     | 82.73       | 88.8    | 85.66        |
|             |                    | VCD           | 85.17     | 83.24       | 88.07   | 85.58        |
|             |                    | VAF           | 85.1      | 82.32       | 89.4    | 85.71        |
|             |                    | FlexAC (Ours) | 85.4      | 83.19       | 88.73   | <b>85.87</b> |

## E Ablation Study

### E.1 Effect of dataset Sizes

To analyze the sensitivity of FlexAC to the number of instances used in control vector construction, we vary Top-K over a wide range:  $\{1, 5, 10, 20, 50, 100, 200, 500, 1000, 1500, 2000\}$ , and evaluate performance on CHAIRs ( $\downarrow$ ), CHAIRi ( $\downarrow$ ), and VDAT ( $\uparrow$ ) using Qwen-VL.

As shown in Figure 17, both FlexAC-P (measured on CHAIR for faithfulness) and FlexAC-C (measured on VDAT for creativity) exhibit similar trends: performance is relatively high but unstable when  $K$  is very small, and stabilizes near its peak around  $K = 50$ . Further increasing  $K$  leads to slight performance degradation, likely due to noise introduced by instances. These results highlight the effectiveness of our Instance Selection strategy, which focuses on selecting a small, high-quality set of associative and non-associative samples.

Notably, across all  $K$  values, FlexAC-C and FlexAC-P consistently appear on opposite sides of the Regular baseline, reflecting two associative reasoning strength. This clear separation demonstrates FlexAC’s capacity to bidirectionally modulate reasoning behavior, enabling controllable transitions between creative and faithful outputs.

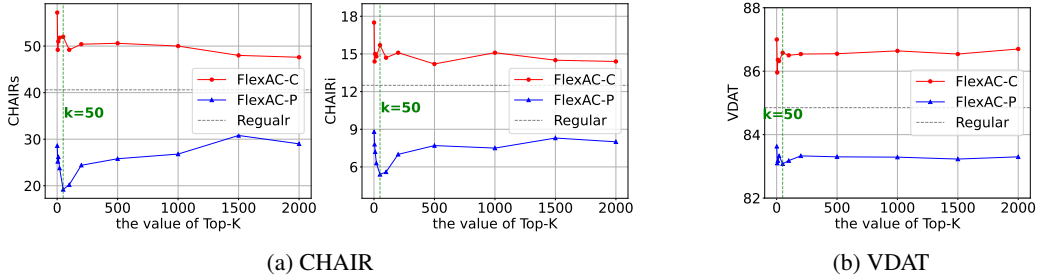

Figure 17: Sensitivity analysis of the Top-K hyperparameter used in general control vector construction on Qwen-VL. We vary the number of selected instances ( $K$ ) and evaluate performance on CHAIRs, CHAIRi, and VDAT benchmarks.

## E.2 Effect of control layer.

To validate the generality of our control layer findings beyond Qwen-VL, we conduct additional layer-wise control effectiveness analysis on LLaVA-1.5 and DeepSeek-VL2, as shown in Appendix Figure 18 and Figure 19. Similar to the trends observed in Qwen-VL, we find that both FlexAC-C and FlexAC-P exhibit consistent improvements in their respective metrics (VDAT and CHAIR) when applied to middle layers. Specifically, the performance peaks around middle layers (layers 10-15) for LLaVA-1.5 and Layers 4-6 for DeepSeek-VL2, which aligns with our feature distance analysis (see Appendix F.4). These results further support our choice of control layers and demonstrate that the effectiveness of FlexAC’s modulation strategy generalizes across diverse MLLM architectures.

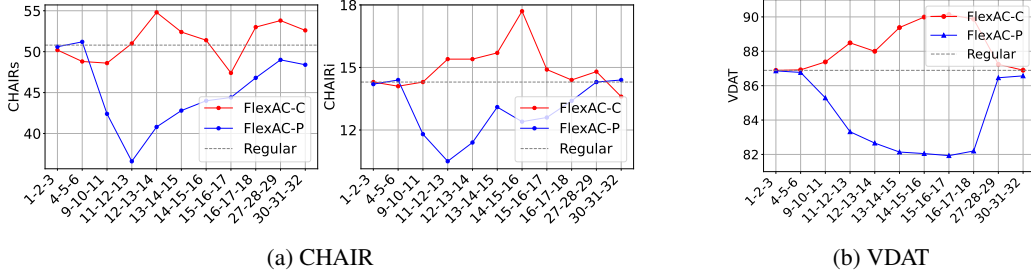

Figure 18: Layer-wise analysis of control effectiveness in FlexAC on LLaVA-1.5. The x-axis represents the control layers, while the y-axis shows the performance of the model on CHAIR and VDAT metrics.

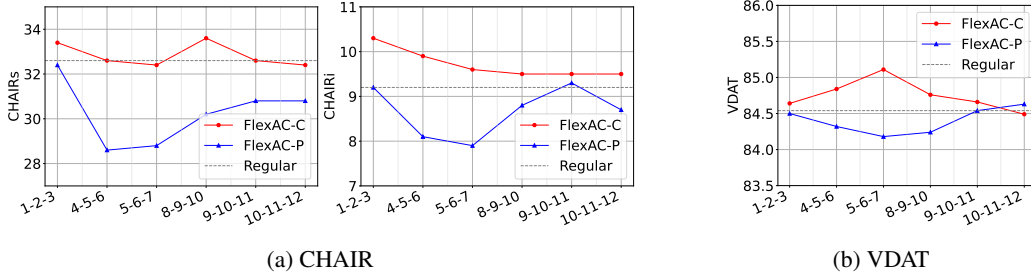

Figure 19: Layer-wise analysis of control effectiveness in FlexAC on DeepSeek-VL2. The x-axis represents the control layers, while the y-axis shows the performance of the model on CHAIR and VDAT metrics.

## F Visualizations

### F.1 Detailed Feature Representation Analysis Using PCA

To provide a more detailed view of how associative and non-associative representations evolve across the model, we present an expanded version of Figure 4 in Figure 20. This visualization shows the PCA-reduced features layer by layer in LLaVA, with red points representing associative features and blue points representing non-associative ones. Compared to the summary visualization, this version reveals how feature separation progressively emerges across layers. In shallow layers (e.g., Layer 0), the two feature types show significant overlap, indicating similar low-level representations. However, starting from the middle layers (around Layer 12), the separation becomes increasingly distinct, highlighting that the model’s associative behavior is primarily shaped in the deeper stages.

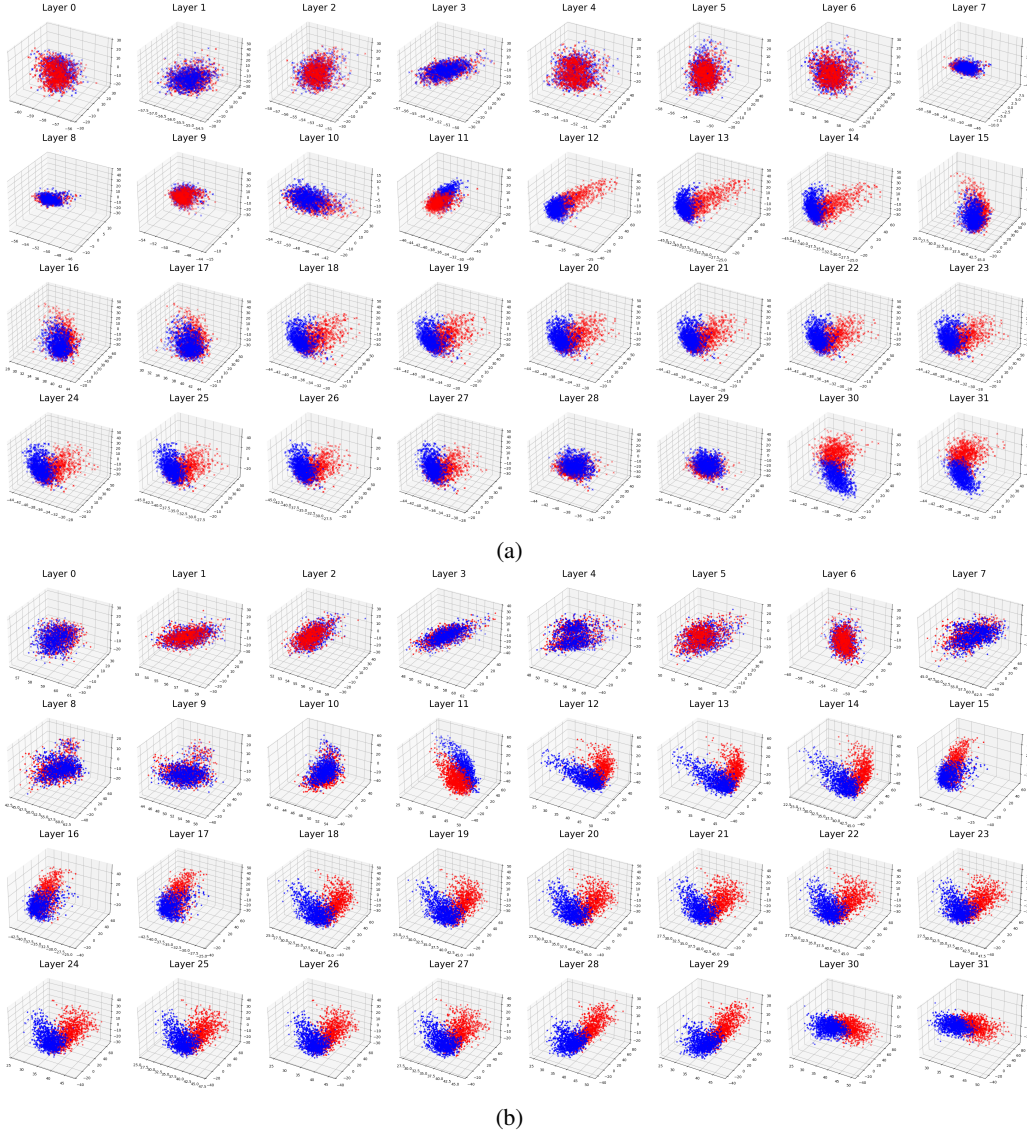

Figure 20: Visualization of feature representations in LLaVA, reduced via PCA, shows the distribution of associative and non-associative data points, represented by red and blue colors, respectively. Subplots (a) and (b) represent the results for different option orders. In deeper layers, the red and blue points exhibit clearer separation, indicating enhanced differentiation between associative and non-associative representations.

## F.2 Detailed Layer Intervention for Association Localization

To gain a more comprehensive understanding of how different layers contribute to associative content generation, we expanded on the analysis presented in Figures 2c and 2d by examining each layer individually. As shown in Figure 21 and Figure 22, the detailed version presented here provides a layer-by-layer breakdown of how the interventions affect the model’s internal representations.

In each subplot of this detailed version, we intervened at a specific layer (denoted by the subplot title, e.g., “Layer 0,” “Layer 1,” etc.) by replacing its associative features with non-associative features. We then analyzed the impact of this intervention on feature distances across all layers. Figure 21 and Figure 22 shows that when shallow layers (e.g., layers before Layer 11) are replaced, the feature distances in subsequent layers do not change significantly. However, when middle layers such as Layer 11 are replaced, the subsequent feature distances drop sharply, indicating that these layers have a crucial impact on the model’s associative tendencies. In contrast, when deeper layers (e.g., layers after Layer 14) are replaced, the changes in subsequent layers become more stable, suggesting that deeper layers have a weaker influence on associative tendencies.

This detailed analysis highlights that replacing features at specific layers has a distinct influence on subsequent layers, with the greatest impact often observed in middle layers. This is consistent with the averaged results in Figures 2c and 2d, which pointed towards the critical role of middle layers in maintaining associative characteristics.

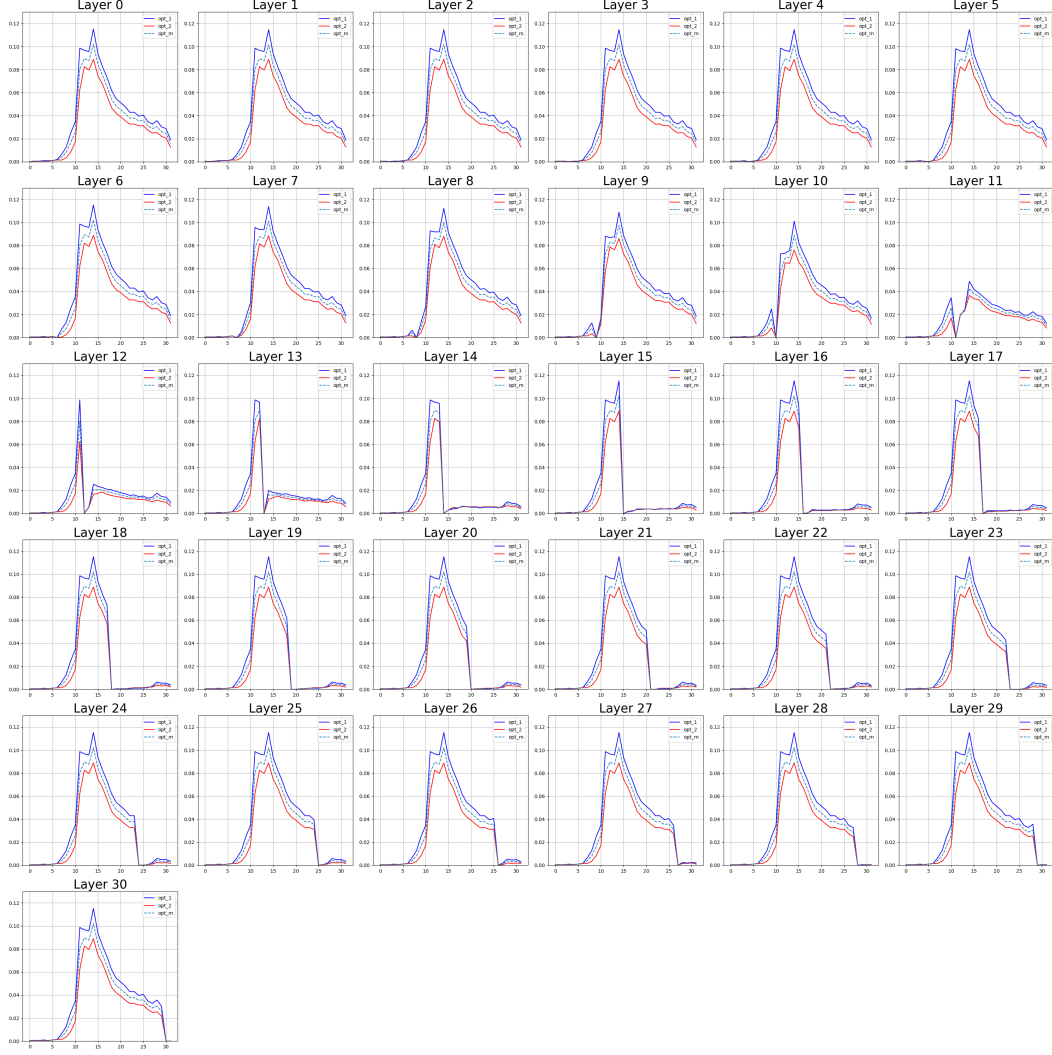

Figure 21: Feature distance analysis across layers after layer intervention. For example, the subplot titled “Layer 12” shows the feature distances across all layers after replacing associative features at Layer 12 with non-associative features. The X-axis represents the different layers, and the Y-axis represents the **Cosine distance** between associative and non-associative data.

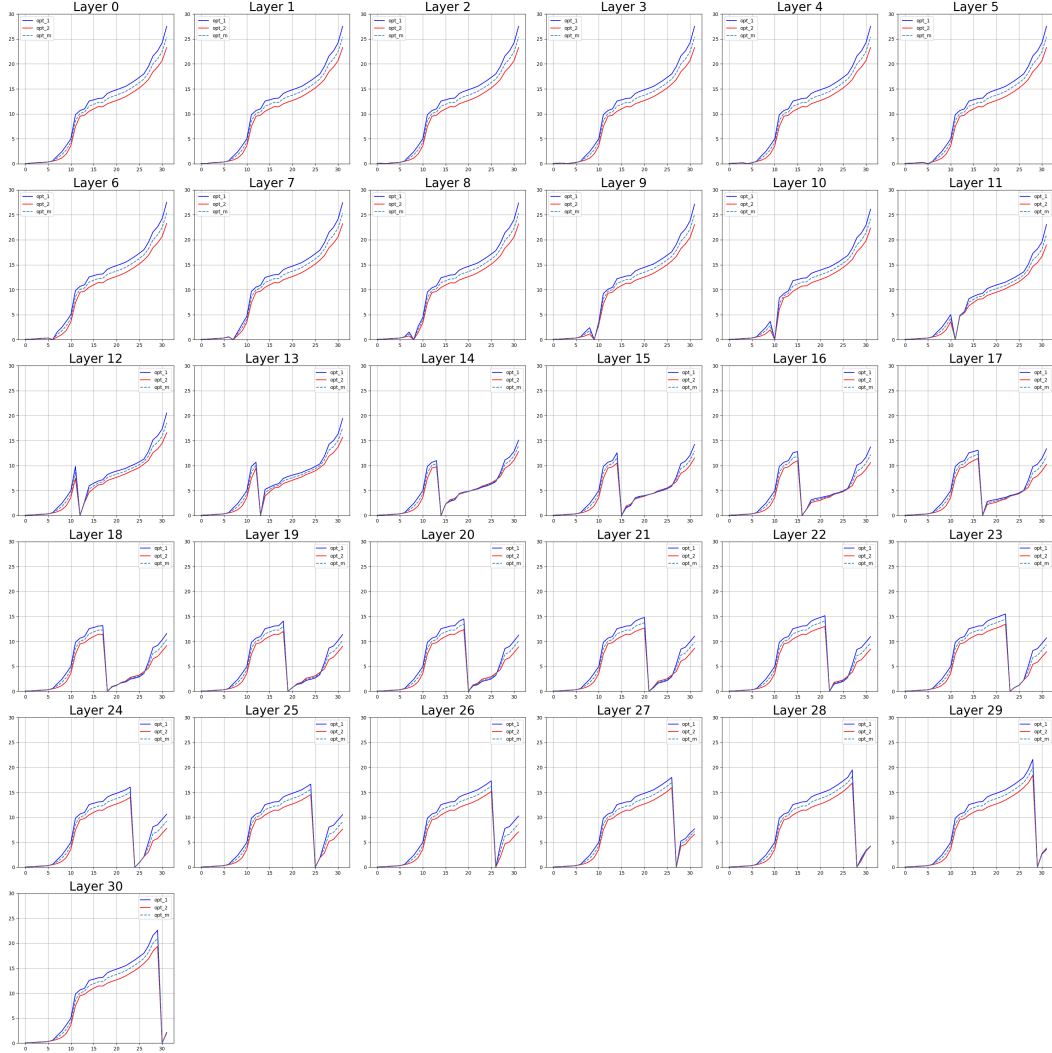

Figure 22: Feature distance analysis across layers after layer intervention. For example, the subplot titled “Layer 12” shows the feature distances across all layers after replacing associative features at Layer 12 with non-associative features. The X-axis represents the different layers, and the Y-axis represents the **Euclidean distance** between associative and non-associative data.

### E.3 Visualization of more examples

We visualize sample outputs from both the creativity- and precision-enhancing variants of FlexAC on Qwen-VL. Figure 23 shows examples from the VDAT benchmark, highlighting differences in associative strength. Additional qualitative results on Creation-MMBench are provided in Figures 24–29, illustrating FlexAC’s ability to adjust associative reasoning across creative tasks.

| VDAT                                                                                | Q: List 10 unrelated, tangible nouns that are not connected to the image or each other.                                                                                                                                                                                                                                                                                                                                                                                                                                                                                                                                                           |
|-------------------------------------------------------------------------------------|---------------------------------------------------------------------------------------------------------------------------------------------------------------------------------------------------------------------------------------------------------------------------------------------------------------------------------------------------------------------------------------------------------------------------------------------------------------------------------------------------------------------------------------------------------------------------------------------------------------------------------------------------|
| 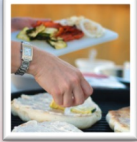   | <div> 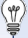 grill, food, plate, vegetable, meat, oven, table, kitchen, cooking, dinner<br/> 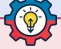 FlexAC-P (<math>\alpha = -1</math>) </div> <div> 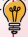 <b>book, chair, tv, bag, car, computer, phone, clock, guitar, cake</b><br/> 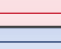 FlexAC-C (<math>\alpha = 1</math>) </div>                                              |
| 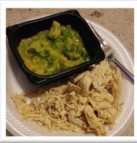   | <div> 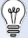 plate, broccoli, food, plastic, container, table, fork, dinner, meal, plate<br/> 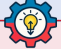 FlexAC-P (<math>\alpha = -1</math>) </div> <div> 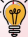 <b>banana, car, book, cake, chair, cup, dog, fork, guitar, house</b><br/> 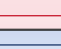 FlexAC-C (<math>\alpha = 1</math>) </div>                                               |
| 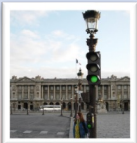   | <div> 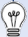 lamp post, traffic light, building, street, sidewalk, traffic, people, traffic signal, street light, street sign.<br/> 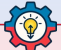 FlexAC-P (<math>\alpha = -1</math>) </div> <div> 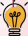 <b>umbrella, elephant, pizza, guitar, book, cake, car, chair, cat, lamp</b><br/> 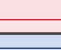 FlexAC-C (<math>\alpha = 1</math>) </div> |
| 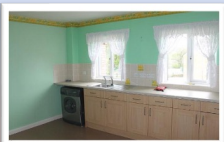 | <div> 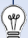 kitchen, <b>dishwasher</b>, cabinets, windows, curtains, sink, counter, floor, wall, light<br/> 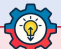 FlexAC-P (<math>\alpha = -1</math>) </div> <div> 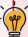 <b>table, chair, book</b>, window, curtain, wall, floor, counter, cabinet, drawer<br/> 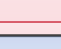 FlexAC-C (<math>\alpha = 1</math>) </div>           |
| 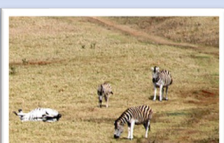 | <div> 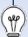 zebra, grass, field, animal, grassy, meadow, <b>herd</b>, grazing, grasslands, wild animal<br/> 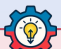 FlexAC-P (<math>\alpha = -1</math>) </div> <div> 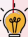 <b>book, cat, car, tree, pizza, guitar, moon, elephant, cake, plane</b><br/> 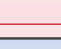 FlexAC-C (<math>\alpha = 1</math>) </div>                     |
| 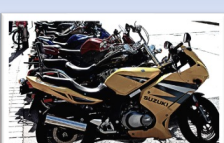 | <div> 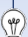 motorcycle, sidewalk, brick, pavement, bike, street, sidewalk, bike, street, pavement<br/> 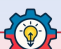 FlexAC-P (<math>\alpha = -1</math>) </div> <div> 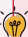 <b>book, chair, car, clock, cake, cat, couch, cup, door, dog</b><br/> 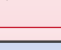 FlexAC-C (<math>\alpha = 1</math>) </div>                                 |
| 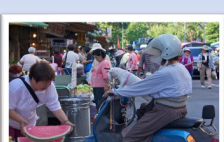 | <div> 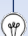 watermelon, scooter, helmet, market, people, car, street, helmet, scooter, market<br/> 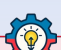 FlexAC-P (<math>\alpha = -1</math>) </div> <div> 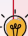 <b>apple, car, truck, helmet, bag, chair, table, umbrella, person, market</b><br/> 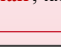 FlexAC-C (<math>\alpha = 1</math>) </div>                        |

Figure 23: **Visualization of FlexAC’s Control on VDAT**, showing how FlexAC-P (faithfulness) and FlexAC-C (creativity) adjust the level of associative strength in the generated responses.

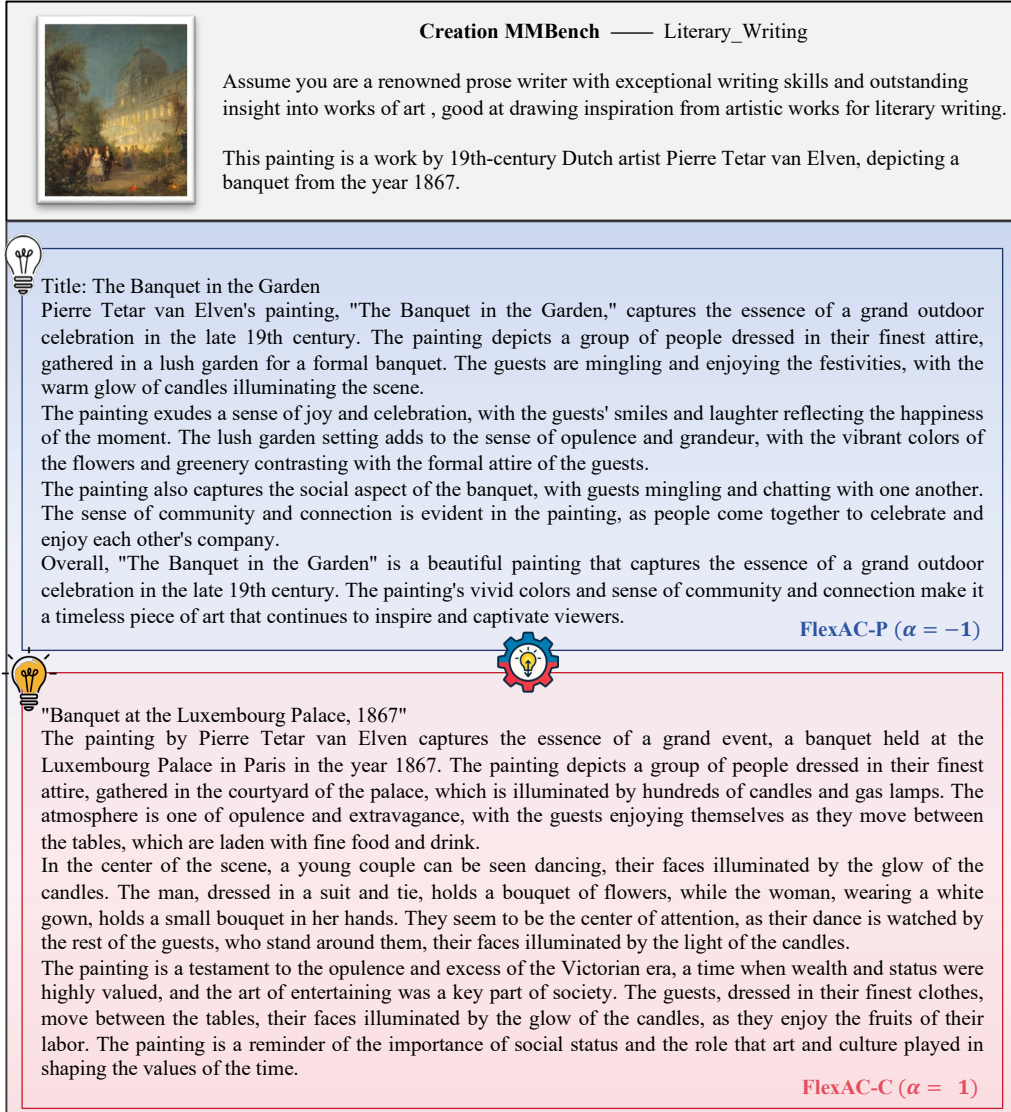

Figure 24: **Visualization of FlexAC’s Control on Creation MMBench**, showing how FlexAC-P (faithfulness) and FlexAC-C (creativity) adjust the level of associative strength in the generated responses.

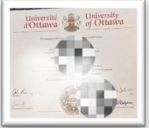
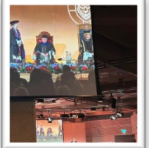

**Creation MMBench** — Literary\_Writing

Assume you are a graduates who have obtained a bachelor's degree from university.  
 These are a series of pictures I took when I graduated  
 Please follow the requirements below to Help me write a Facebook summary about this ceremony.

1. Describe the process of participating in the graduation ceremony and the unforgettable moments.
2. Share your reflections and insights gained from the graduation ceremony.
3. Let others know the significance of this honor, as well as the achievements and experiences you gained during the study.

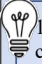

1. The graduation ceremony was a momentous occasion for me, filled with emotions and memories that will be cherished forever. I remember walking across the stage, receiving my degree, and feeling a sense of accomplishment and pride that words cannot express.

2. Reflecting on the graduation ceremony, I realize that it was not just about receiving a degree, but also about celebrating the hard work, dedication, and perseverance that went into achieving it. It was a reminder that every achievement is the result of countless hours of effort and sacrifice.

3. The significance of my graduation cannot be overstated. It is a symbol of my academic achievements and a milestone in my personal and professional journey. It also marks the beginning of a new chapter, filled with opportunities and possibilities.

**FlexAC-P ( $\alpha = -1$ )**

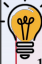
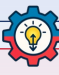
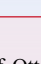

1. Today, I have the honor of participating in the graduation ceremony of the University of Ottawa. The ceremony took place in the university's auditorium, where I was seated in the front row along with my fellow graduates. The atmosphere was electric, with everyone eagerly awaiting the start of the ceremony. The university president and vice-chancellor delivered a speech, highlighting the achievements of the graduating class and encouraging us to pursue our dreams. After the speech, it was time for the graduation procession. We lined up in our caps and gowns, and the university president and vice-chancellor led us to the stage. We received our degrees and shook hands with the university president. It was an unforgettable moment, and I felt a sense of pride and accomplishment wash over me.

2. Reflecting on the graduation ceremony, I realize that it is not just about receiving a degree, but also about celebrating the hard work and dedication that we have put in over the past few years. It is a time to reflect on the experiences we have had, the people we have met, and the challenges we have overcome. I am grateful for the opportunities that the University of Ottawa has given me, and I am excited to see where this journey will take me. I am also proud of the achievements of my fellow graduates, and I am inspired by their stories and experiences.

3. The significance of this honor lies in the fact that it represents the culmination of years of hard work and dedication. It is a recognition of the knowledge and skills that we have acquired, and it is a testament to our commitment to excellence. The graduation ceremony is not just about receiving a degree, but also about celebrating the achievements of a group of individuals who have come together to pursue their dreams. It is a time to reflect on the experiences we have had, the people we have met, and the challenges we have overcome. It is a time to look forward to the future with hope and excitement, knowing that we have the skills and knowledge to succeed in whatever we choose to do.

**FlexAC-C ( $\alpha = 1$ )**

Figure 25: **Visualization of FlexAC's Control on Creation MMBench**, showing how FlexAC-P (faithfulness) and FlexAC-C (creativity) adjust the level of associative strength in the generated responses.

### Creation MMBench — Literary\_Writing

Assume you are talented children's animation creators who have a profound insight into the story plot and a unique understanding of the picture content, and have the ability to continue to narrate and complete a wonderful story according to the content of the previous foreshadows.

These are the first few scenes of the children's animation: A group of dinosaur friends is standing on a grassy field.

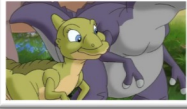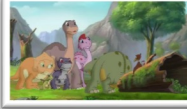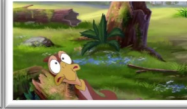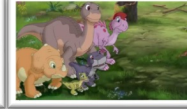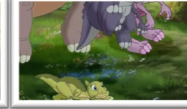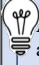

As the sun began to set, the group of dinosaur friends, including a cute little T-Rex, a friendly Triceratops, and a wise old Stegosaurus, gathered together on the grassy field. They had been on a long adventure, exploring the lush green landscapes and encountering new friends along the way. As they sat together, they shared stories of their adventures and the fun they had had together. The T-Rex, who was known for his love of adventure, spoke of the excitement of discovering new lands and meeting new creatures. The Triceratops, who was known for his calm and steady nature, spoke of the joy of simply being surrounded by the beauty of nature. The Stegosaurus, who was known for his wise words, spoke of the importance of friendship and the value of the bonds we form with others. As the sun set behind them, the group of dinosaur friends sat in silence, content in the knowledge that they had each other and the memories of their adventures.

FlexAC-P ( $\alpha = -1$ )

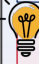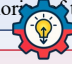

As the group of dinosaur friends stands on the grassy field, they notice a small, colorful butterfly flitting about. The baby dinosaur, who is still a bit too small to walk, is fascinated by the fluttering insect.

"Wow, look at that pretty butterfly!" the baby dinosaur says, pointing excitedly at the tiny creature.

"I've never seen one before," says the baby triceratops, who is standing next to the baby dinosaur. "Do you think it's a dragonfly?"

"No, it's a butterfly," the baby pteranodon corrects, with a grin on his face. "Butterflies are way cooler than dragonflies."

The baby tyrannosaurus, who is standing at the back of the group, chimes in with a giggle. "I want to catch one! Can we, Mommy?"

The mother triceratops, who is standing nearby, gives the baby a warning look. "We can't catch the butterfly, honey. It's too fast and too fragile. We have to be careful not to hurt it."

The baby dinosaur pouts. "But I want to play with it! Can't we just touch it?"

The mother dinosaur sighs. "I'm sorry, but we can't touch the butterfly. It's too delicate. We have to be careful not to harm it."

The baby dinosaur huffs, but the mother dinosaur is right. Butterflies are very fragile creatures, and they need to be treated with care. The baby dinosaur decides to watch the butterfly as it flutters around them, fascinated by its colors and movements.

As they watch, the baby dinosaur notices a small, wiggly worm crawling nearby. "Hey, look at that!" he says, pointing excitedly at the worm. "It's so cool! Can we touch it?"

The mother dinosaur shakes her head. "No, honey. That's a worm. They're not very pretty, but they're important to the ecosystem. We have to be careful not to harm them, too."

The baby dinosaur pouts again, but the mother dinosaur is right. Worms are important to the soil and the plants, and they help the plants grow. The baby dinosaur decides to watch the worm as it wriggles around them, fascinated by its movements.

As they watch, the baby dinosaur notices a small, colorful flower blooming nearby. "Wow, look at that!" he says, pointing excitedly at the flower. "It's so pretty! Can

FlexAC-C ( $\alpha = 1$ )

Figure 26: **Visualization of FlexAC's Control on Creation MMBench**, showing how FlexAC-P (faithfulness) and FlexAC-C (creativity) adjust the level of associative strength in the generated responses.

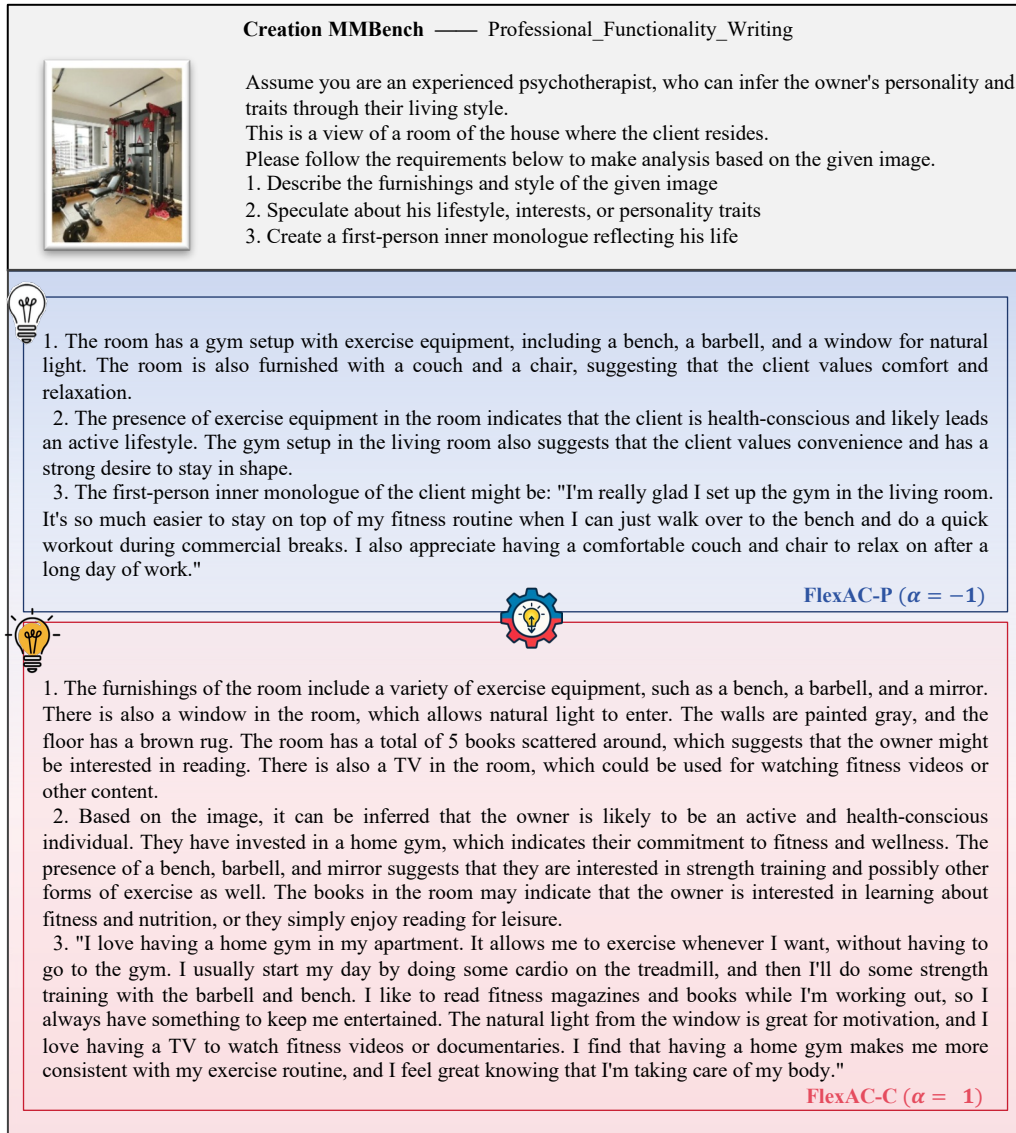

Figure 27: **Visualization of FlexAC's Control on Creation MMBench**, showing how FlexAC-P (faithfulness) and FlexAC-C (creativity) adjust the level of associative strength in the generated responses.

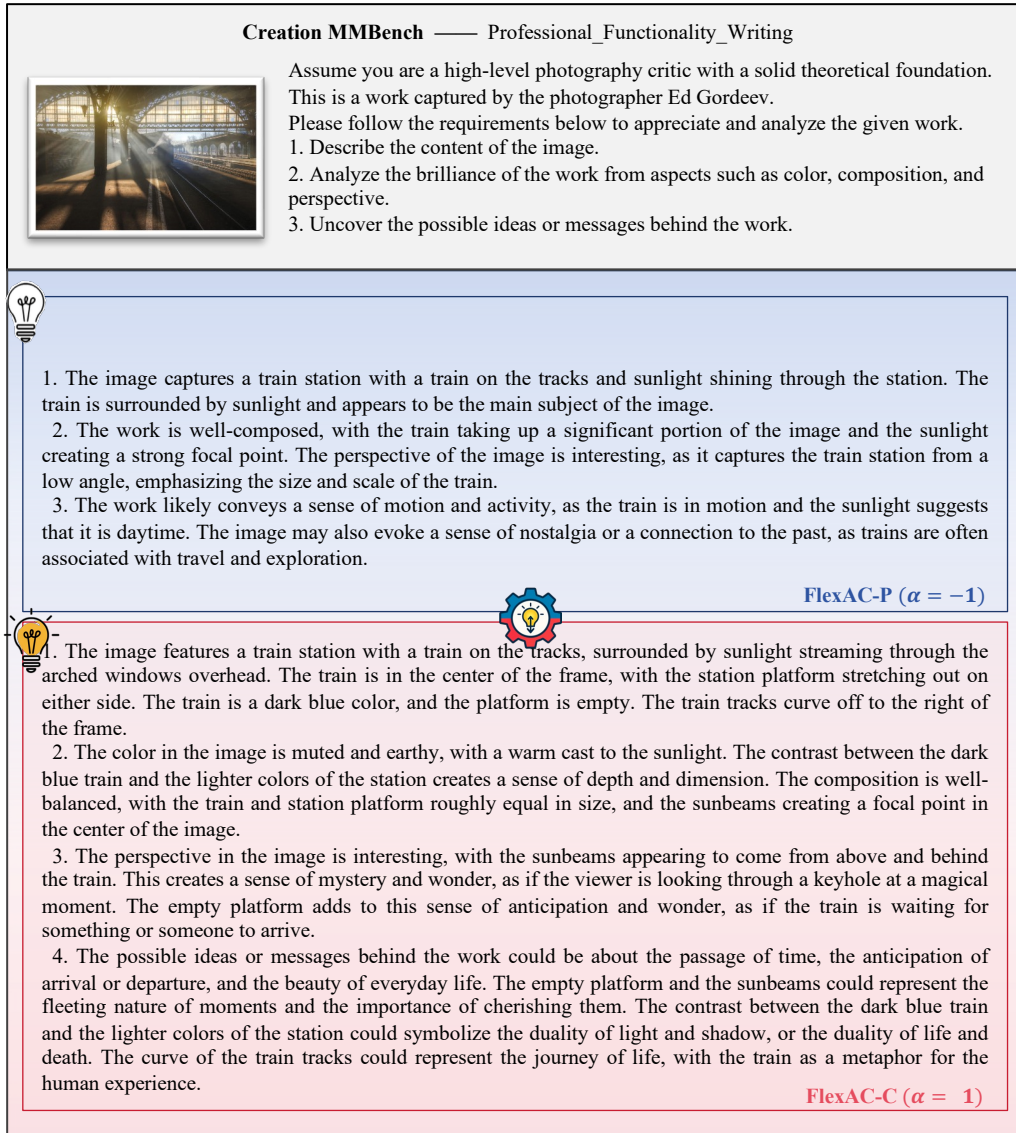

Creation MMBench — Common\_Functionality\_Writing

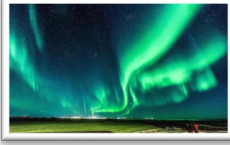

Assume you are an experienced adventurer. You have the habit of writing a travel journal every day. You tell about the beautiful things you have seen, the interesting things you have encountered, and the feelings you have had during your trip. This is a scenic photo taken during the tour today. Please follow the requirements below to write today's travel journal.

1. Describe the Scenery: Use sensory details to vividly convey what you saw, heard, or felt in the landscape.
2. Chronological Storytelling: Narrate the day's events from a first-person perspective, starting with your arrival and ending with your reflections.
3. Highlight Adventure: Include one or two adventurous moments or challenges (e.g., navigating tough terrain or encountering wildlife).
4. Emotional Reflection: Share how the scenery and the day's experiences made you feel as an adventurer.
5. Tie to the Photo: Explain why you captured this photo and how it connects to the most exciting or meaningful part of your day.

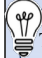

Today was an incredible day of adventure and exploration. I arrived at my destination and was immediately struck by the stunning scenery. The photo I have captured perfectly captures the beauty of the landscape, with the bright green Northern Lights dancing across the sky.

As I explored the area, I heard the sound of rushing water, which led me to a beautiful waterfall. The sound of the water was so peaceful and calming, it was a welcome break from the excitement of the day.

One of the most exciting moments of the day was when I encountered a group of hikers who were also out to see the Northern Lights. We all huddled together and watched in awe as the Northern Lights lit up the sky in a stunning display.

As the day came to an end, I reflected on the beauty of nature and the sense of adventure that comes with exploring new places. I am so grateful to have captured this moment in time, and I know that it will be a memory that I will treasure for years to come.

FlexAC-P ( $\alpha = -1$ )

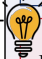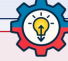

#### Day 3: Northern Lights Tour

I woke up early this morning, excited to embark on a Northern Lights tour. The sky was clear and the stars were shining bright as I made my way to the tour bus. The tour guide, a friendly and knowledgeable fellow, greeted us all and gave us a quick briefing on what to expect during the tour.

We drove for a few hours, driving through the rugged terrain of Iceland, passing by stunning landscapes and waterfalls. The tour group was made up of travelers from all over the world, and we all shared our excitement and anticipation for what was to come.

As the night fell, the sky turned a beautiful shade of pink and purple, and we could see the Northern Lights starting to dance in the distance. The tour guide explained that the Northern Lights are caused by charged particles from the sun colliding with the Earth's atmosphere, creating a beautiful display of light and color.

We drove further into the wilderness, and soon we were surrounded by nothing but the stars and the Northern Lights. The display was like nothing I had ever seen before - a beautiful, otherworldly sight that left me in awe. The Northern Lights were like a dance, moving and changing colors in a way that was almost too beautiful to be real.

We spent the next few hours watching the Northern Lights, taking pictures and simply enjoying the moment. It was a truly magical experience, and one that I will never forget.

As the night came to an end, we headed back to our hotel, tired but happy. I felt grateful to have been able to witness such a beautiful natural phenomenon, and I knew that this would be a trip that I would always remember.

I took a photo of the Northern Lights, knowing that this would be a memory that I would always treasure. The Northern Lights were like a reminder that there is so much more to this world than we can ever imagine, and that every day, we have the opportunity to be amazed by something new.

I went to bed that night feeling grateful and humbled by the beauty of the world around us. I knew that I would never forget this trip, and that I would always look back on it with a sense of wonder and awe.

FlexAC-C ( $\alpha = 1$ )

Figure 29: **Visualization of FlexAC's Control on Creation MMBench**, showing how FlexAC-P (faithfulness) and FlexAC-C (creativity) adjust the level of associative strength in the generated responses.

#### F.4 Feature Distance Analysis on Additional Models

To complement the analysis in Section 3.1, we extend the feature distance evaluation to two additional MLLMs: Qwen-VL and Deepseek-VL2. As in the main study, we compute the cosine and Euclidean distances between associative and non-associative representations extracted from each transformer layer. The results are shown in Figure 30.

Consistent with our findings on LLaVA, we observe that cosine distance peaks in the middle layers, while Euclidean distance gradually increases throughout the network. These patterns reinforce the conclusion that associative behavior primarily emerges and diverges in the middle layers, while deep layers largely propagate those effects.

Importantly, this analysis also informs the design of our control strategy. In Qwen-VL, the middle layers are approximately 13 – 20, and in DeepSeek-VL2, 3 – 7. Accordingly, we select Layers 15 – 17 for Qwen-VL and Layers 4 – 6 for DeepSeek-VL2 as control points in FlexAC. These ranges correspond to the regions of maximal divergence between associative and non-associative features, enabling targeted yet lightweight intervention.

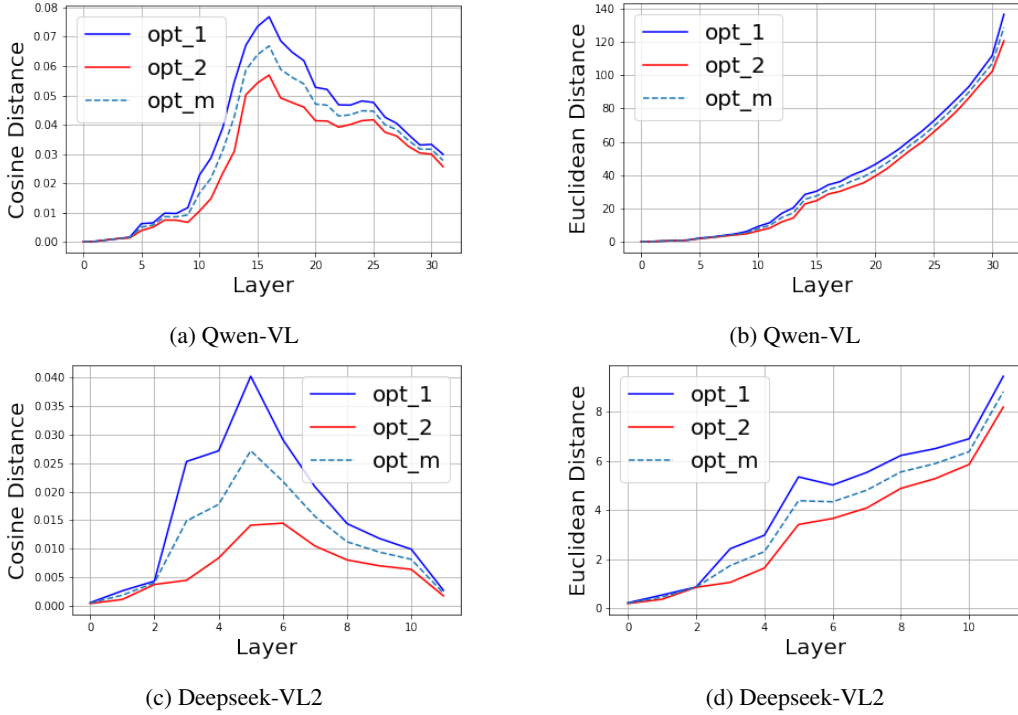

Figure 30: Layer-wise feature distance trends between associative and non-associative representations on Qwen-VL and Deepseek-VL2, extending the LLaVA results from Section 3.1.

## References

- [1] Sicong Leng, Hang Zhang, Guanzheng Chen, Xin Li, Shijian Lu, Chunyan Miao, and Lidong Bing. Mitigating object hallucinations in large vision-language models through visual contrastive decoding. In *CVPR*, pages 13872–13882, 2024. 2
- [2] Xintong Wang, Jingheng Pan, Liang Ding, and Chris Biemann. Mitigating hallucinations in large vision-language models with instruction contrastive decoding. In *Findings of the Association for Computational Linguistics ACL 2024*, pages 15840–15853, 2024. 2
- [3] Nina Rimskey, Nick Gabrieli, Julian Schulz, Meg Tong, Evan Hubinger, and Alexander Turner. Steering llama 2 via contrastive activation addition. In *ACL*, pages 15504–15522, 2024. 2
- [4] Xinyu Fang, Zhijian Chen, Kai Lan, Lixin Ma, Shengyuan Ding, Yingji Liang, Xiangyu Zhao, Farong Wen, Zicheng Zhang, Guofeng Zhang, Haodong Duan, Kai Chen, and Dahua Lin. Creation-mmbench: Assessing context-aware creative intelligence in MLLM. *CoRR*, abs/2503.14478, 2025. 2
- [5] Anna Rohrbach, Lisa Anne Hendricks, Kaylee Burns, Trevor Darrell, and Kate Saenko. Object hallucination in image captioning. In *EMNLP*, pages 4035–4045, 2018. 2
- [6] Yifan Li, Yifan Du, Kun Zhou, Jinpeng Wang, Wayne Xin Zhao, and Ji-Rong Wen. Evaluating object hallucination in large vision-language models. In *EMNLP*, pages 292–305, 2023. 3
- [7] Tsung-Yi Lin, Michael Maire, Serge J. Belongie, James Hays, Pietro Perona, Deva Ramanan, Piotr Dollár, and C. Lawrence Zitnick. Microsoft COCO: common objects in context. In *ECCV*, pages 740–755, 2014. 3
- [8] Chaoyou Fu, Peixian Chen, Yunhang Shen, Yulei Qin, Mengdan Zhang, Xu Lin, Zhenyu Qiu, Wei Lin, Jinrui Yang, Xiawu Zheng, Ke Li, Xing Sun, and Rongrong Ji. MME: A comprehensive evaluation benchmark for multimodal large language models. *CoRR*, 2023. 3
- [9] Xiang Yue, Yuansheng Ni, Kai Zhang, Tianyu Zheng, Ruoqi Liu, Ge Zhang, Samuel Stevens, Dongfu Jiang, Weiming Ren, Yuxuan Sun, Cong Wei, Botao Yu, Ruibin Yuan, Renliang Sun, Ming Yin, Boyuan Zheng, Zhenzhu Yang, Yibo Liu, Wenhao Huang, Huan Sun, Yu Su, and Wenhui Chen. Mmmu: A massive multi-discipline multimodal understanding and reasoning benchmark for expert agi. In *CVPR*, 2024. 3
- [10] Lin Chen, Jinsong Li, Xiaoyi Dong, Pan Zhang, Yuhang Zang, Zehui Chen, Haodong Duan, Jiaqi Wang, Yu Qiao, Dahua Lin, and Feng Zhao. Are we on the right way for evaluating large vision-language models? In *NeurIPS*, 2024. 3
- [11] Weihao Yu, Zhengyuan Yang, Linjie Li, Jianfeng Wang, Kevin Lin, Zicheng Liu, Xinchao Wang, and Lijuan Wang. Mm-vet: evaluating large multimodal models for integrated capabilities. In *ICML*, pages 57730–57754, 2024. 7
- [12] Yuan Liu, Haodong Duan, Yuanhan Zhang, Bo Li, Songyang Zhang, Wangbo Zhao, Yike Yuan, Jiaqi Wang, Conghui He, Ziwei Liu, et al. Mmbench: Is your multi-modal model an all-around player? In *European conference on computer vision*, pages 216–233. Springer, 2024. 7
- [13] Bohao Li, Rui Wang, Guangzhi Wang, Yuying Ge, Yixiao Ge, and Ying Shan. Seed-bench: Benchmarking multimodal llms with generative comprehension. *arXiv preprint arXiv:2307.16125*, 2023. 7
- [14] Hai-Long Sun, Da-Wei Zhou, Yang Li, Shiyin Lu, Chao Yi, Qing-Guo Chen, Zhao Xu, Weihua Luo, Kaifu Zhang, De-Chuan Zhan, and Han-Jia Ye. Parrot: Multilingual visual instruction tuning. In *ICML*, 2025. 7
- [15] xAI. Grok-1.5 vision preview. <https://x.ai/news/grok-1.5v>, April 2024. Accessed: 2025-10-14. 7
- [16] Nannan Zhu, Yonghao Dong, Teng Wang, Xueqian Li, Shengjun Deng, Yijia Wang, Zheng Hong, Tiantian Geng, Guo Niu, Hanyan Huang, et al. Cvbench: Evaluating cross-video synergies for complex multimodal understanding and reasoning. *arXiv preprint arXiv:2508.19542*, 2025. 7

- [17] Aniruddha Kembhavi, Mike Salvato, Eric Kolve, Minjoon Seo, Hannaneh Hajishirzi, and Ali Farhadi. A diagram is worth a dozen images, 2016. 7
- [18] Amanpreet Singh, Vivek Natarjan, Meet Shah, Yu Jiang, Xinlei Chen, Devi Parikh, and Marcus Rohrbach. Towards vqa models that can read. In *CVPR*, pages 8317–8326, 2019. 7
- [19] Ahmed Masry, Xuan Long Do, Jia Qing Tan, Shafiq Joty, and Enamul Hoque. Chartqa: A benchmark for question answering about charts with visual and logical reasoning. In *Findings of the Association for Computational Linguistics: ACL 2022*, pages 2263–2279, 2022. 7
- [20] Minesh Mathew, Dimosthenis Karatzas, and CV Jawahar. Docvqa: A dataset for vqa on document images. In *WACV*, pages 2200–2209, 2021. 7
- [21] Anand Mishra, Shashank Shekhar, Ajeet Kumar Singh, and Anirban Chakraborty. Ocr-vqa: Visual question answering by reading text in images. In *ICDAR*, 2019. 7
